# Supplementary material
Source: PubMed Central journal article supplement (PMC3737603)
Supplement: es304367t_si_001.pdf [file es304367t_si_001.pdf]

# **A global assessment of the performance of quantitative PCR assays targeting human- and ruminant-associated *Bacteroidetes* for microbial source tracking**

Georg H. Reischer<sup>a,b,\*</sup>, James E. Ebdon<sup>c</sup>, Johanna M. Bauer<sup>a</sup>, Nathalie Schuster<sup>a</sup>, Warish Ahmed<sup>d</sup>, Johan Åström<sup>e</sup>, Anicet R. Blanch<sup>f</sup>, Günter Blöschl<sup>g</sup>, Denis Byamukama<sup>h</sup>, Tricia Coakley<sup>i</sup>, Christobel Ferguson<sup>j</sup>, Goraw Goshu<sup>k</sup>, GwangPyo Ko<sup>l</sup>, Ana Maria de Roda Husman<sup>m</sup>, Douglas Mushi<sup>n</sup>, Ramiro Poma<sup>o</sup>, Bandana Pradhan<sup>p</sup>, Veronica Rajal<sup>o</sup>, Margit A. Schade<sup>q</sup>, Regina Sommer<sup>r,b</sup>, Huw Taylor<sup>c</sup>, Erika M. Toth<sup>s</sup>, Virgil Vrajmasu<sup>t</sup>, Stefan Wuertz<sup>u</sup>, Robert L. Mach<sup>a</sup>, and Andreas H. Farnleitner<sup>a,b</sup>

Contents:

Tables S1, S2

Figures S1, S2, S3, S4a-d, S5, S6a-e, S7a-d, S8

15 pages

**Table S1. Selected qPCR assays analyzed in this study.**

| Assay  | Target              | Primers and probes                                                                                                                                   | Temp.    | Ref. |
|--------|---------------------|------------------------------------------------------------------------------------------------------------------------------------------------------|----------|------|
| AllBac | <i>Bacteroides</i>  | AllBac296f (GAGAGGAAGGTCCCCCAC)<br>AllBac412r (CGCTACTTGGCTGGTTCAG)<br>AllBac375Bhqr (FAM-CCATTGACCAATATTCCTCACTGCTGCCT-NFQ)                         | 60       | (9)  |
| BacH   | human               | BacH_f (CTTGGCCAGCCTTCTGAAAG)<br>BacH_r (CCCCATCGTCTACCGAAAATAC)<br>BacH_pC (FAM-TCATGATCCCATCCTG-NFQ-MGB)<br>BacH_pT (FAM-TCATGATGCCATCTTG-NFQ-MGB) | 61       | (15) |
| BacHum | human               | BacHum-160f (TGAGTTCACATGTCCGCATGA)<br>BacHum-241r (CGTTACCCCGCCTACTATCTAATG)<br>BacHum-193p (FAM-TCCGGTAGACGATGGGGATGCGTT-NFQ)                      | 60       | (10) |
| BacCow | ruminant            | BacCow-CF128f (CCAACYTTCCCGWTACTC)<br>BacCow-305 (GGACCGTGTCTCAGTTCAGTG)<br>BacCow-257p (FAM-TAGGGGTTCTGAGAGGAAGGTCCCC-NFQ)                          | 60       | (10) |
| BacR   | ruminant            | BacR_f (GCGTATCCAACCTTCCCG)<br>BacR_r (CATCCCCATCCGTTACCG)<br>BacR_p (FAM-CTTCCGAAAGGGAGATT-NFQ-MGB)                                                 | 60       | (16) |
| BoBac  | bovine <sup>a</sup> | BoBac367f (GAAG(G/A)CTGAACCAGCCAAGTA)<br>BoBac467r (GCTTATTCATACGGTACATAACAAG)<br>BoBac402Bhqr (FAM-TGAAGGATGAAGGTTCTATGGATTGTAACTT-NFQ)             | 57<br>53 | (9)  |

<sup>a</sup> Although this assay was published as cattle-associated the results of this study lead to the decision to handle it as a ruminant-associated assay.  
Ref., reference; Temp., optimised annealing temperature; FAM, 6-carboxyfluorescein; NFQ, nonfluorescent quencher; MGB, minor groove binder

**Table S2. Sample provenance and host species.**

| species             |                                | sum of individuals | Argentina | Australia | Austria   | Germany   | Hungary   | Nepal     | Nether-lands | Romania   | South Korea | Spain     | Sweden    | Tanzania | Uganda    | UK        | USA       |   |
|---------------------|--------------------------------|--------------------|-----------|-----------|-----------|-----------|-----------|-----------|--------------|-----------|-------------|-----------|-----------|----------|-----------|-----------|-----------|---|
| <b>human</b>        | <b>human</b>                   | 61                 | 5         | 6         | 5         | 5         | 4         | 2         | 3            | 3         | 5           | 3         | 5         | 2        | 3         | 5         | 5         |   |
| <b>ruminants</b>    | <b>ruminants</b>               |                    |           |           |           |           |           |           |              |           |             |           |           |          |           |           |           |   |
|                     | cattle                         | 47                 | 3         | 5         | 1         | 3         | 2         | 4         | -            | 3         | 5           | 5         | 4         | -        | 1         | 5         | 6         |   |
|                     | sheep                          | 16                 | 2         | -         | 1         | 1         | 2         | -         | -            | 2         | -           | -         | 2         | 1        | -         | 5         | -         |   |
|                     | deer                           | 8                  | -         | -         | 1         | -         | -         | -         | 5            | -         | -           | -         | -         | -        | -         | -         | 2         |   |
|                     | chamois                        | 1                  | -         | -         | 1         | -         | -         | -         | -            | -         | -           | -         | -         | -        | -         | -         | -         |   |
|                     | goat                           | 6                  | -         | -         | 1         | 1         | 2         | 1         | -            | -         | -           | -         | -         | -        | 1         | -         | -         |   |
|                     | llama                          | 1                  | -         | -         | -         | -         | -         | -         | -            | -         | -           | -         | -         | -        | -         | -         | 1         |   |
|                     | <b>group sum</b>               | <b>79</b>          | <b>5</b>  | <b>5</b>  | <b>5</b>  | <b>5</b>  | <b>6</b>  | <b>5</b>  | <b>5</b>     | <b>5</b>  | <b>5</b>    | <b>5</b>  | <b>6</b>  | <b>1</b> | <b>2</b>  | <b>10</b> | <b>9</b>  |   |
|                     | <b>non-ruminant herbivores</b> |                    |           |           |           |           |           |           |              |           |             |           |           |          |           |           |           |   |
|                     | horse                          |                    | 3         | -         | 3         | 2         | -         | -         | -            | -         | 3           | -         | -         | 2        | -         | -         | -         | 4 |
| donkey              | 2                              | -                  | -         | -         | -         | -         | -         | -         | -            | -         | -           | -         | -         | -        | 2         | -         | -         |   |
| zebra               | 1                              | -                  | -         | -         | -         | -         | -         | -         | -            | -         | -           | -         | -         | 1        | -         | -         | -         |   |
| kangaroo            | 4                              | -                  | 4         | -         | -         | -         | -         | -         | -            | -         | -           | -         | -         | -        | -         | -         | -         |   |
| hare/rabbit         | 3                              | -                  | -         | 1         | -         | -         | -         | -         | -            | -         | -           | 1         | -         | -        | -         | -         | 1         |   |
| groundhog           | 1                              | -                  | -         | 1         | -         | -         | -         | -         | -            | -         | -           | -         | -         | -        | -         | -         | -         |   |
| <b>group sum</b>    | <b>28</b>                      | <b>3</b>           | <b>4</b>  | <b>5</b>  | <b>2</b>  | <b>-</b>  | <b>-</b>  | <b>-</b>  | <b>3</b>     | <b>-</b>  | <b>1</b>    | <b>2</b>  | <b>-</b>  | <b>3</b> | <b>-</b>  | <b>5</b>  |           |   |
| <b>omnivores</b>    |                                |                    |           |           |           |           |           |           |              |           |             |           |           |          |           |           |           |   |
| pig                 | 21                             | -                  | -         | 2         | 2         | -         | 2         | 5         | 2            | 5         | -           | -         | -         | 2        | -         | 1         | -         |   |
| wild boar           | 8                              | -                  | -         | 1         | -         | -         | -         | 5         | -            | -         | -           | -         | -         | 2        | -         | -         | -         |   |
| <b>group sum</b>    | <b>29</b>                      | <b>-</b>           | <b>-</b>  | <b>3</b>  | <b>2</b>  | <b>-</b>  | <b>2</b>  | <b>10</b> | <b>2</b>     | <b>5</b>  | <b>-</b>    | <b>-</b>  | <b>-</b>  | <b>4</b> | <b>-</b>  | <b>1</b>  | <b>-</b>  |   |
| <b>carnivores</b>   |                                |                    |           |           |           |           |           |           |              |           |             |           |           |          |           |           |           |   |
| dog                 | 29                             | 3                  | 3         | 2         | 2         | -         | 2         | -         | 2            | -         | 5           | 2         | -         | 1        | 3         | 4         |           |   |
| cat                 | 7                              | -                  | -         | -         | 1         | -         | 1         | -         | -            | -         | -           | 2         | -         | -        | -         | 3         |           |   |
| coyote              | 1                              | -                  | -         | -         | -         | -         | -         | -         | -            | -         | -           | -         | -         | -        | -         | 1         |           |   |
| opossum             | 1                              | -                  | -         | -         | -         | -         | -         | -         | -            | -         | -           | -         | -         | -        | -         | 1         |           |   |
| otter               | 1                              | -                  | -         | -         | -         | -         | -         | -         | -            | -         | -           | -         | -         | -        | -         | 1         |           |   |
| <b>group sum</b>    | <b>39</b>                      | <b>3</b>           | <b>3</b>  | <b>2</b>  | <b>3</b>  | <b>-</b>  | <b>3</b>  | <b>-</b>  | <b>2</b>     | <b>-</b>  | <b>5</b>    | <b>4</b>  | <b>-</b>  | <b>1</b> | <b>3</b>  | <b>10</b> |           |   |
| <b>birds</b>        |                                |                    |           |           |           |           |           |           |              |           |             |           |           |          |           |           |           |   |
| chicken             | 19                             | 1                  | -         | -         | 1         | -         | 2         | -         | 2            | 5         | -           | 2         | 1         | 1        | 3         | 1         |           |   |
| duck                | 5                              | -                  | 2         | -         | -         | -         | -         | -         | 1            | -         | -           | 2         | -         | -        | -         | -         |           |   |
| pigeon              | 3                              | 2                  | -         | -         | -         | -         | -         | -         | -            | -         | -           | -         | -         | -        | 1         | -         |           |   |
| goose               | 3                              | -                  | -         | -         | 1         | -         | -         | -         | -            | -         | -           | 1         | -         | -        | -         | 1         |           |   |
| turkey              | 2                              | -                  | -         | -         | -         | -         | -         | -         | -            | -         | -           | -         | 1         | 1        | -         | -         |           |   |
| starling            | 2                              | -                  | -         | -         | -         | -         | -         | -         | -            | -         | -           | -         | -         | -        | 2         | -         |           |   |
| gull                | 1                              | -                  | -         | -         | -         | -         | -         | -         | -            | -         | -           | -         | -         | -        | -         | 1         |           |   |
| parrot              | 1                              | -                  | -         | -         | -         | -         | -         | -         | -            | -         | -           | -         | -         | 1        | -         | -         |           |   |
| coot                | 1                              | -                  | -         | -         | 1         | -         | -         | -         | -            | -         | -           | -         | -         | -        | -         | -         |           |   |
| grebe               | 1                              | -                  | -         | -         | -         | -         | -         | -         | -            | -         | -           | -         | -         | -        | -         | 1         |           |   |
| owl                 | 1                              | -                  | -         | -         | -         | -         | -         | -         | -            | -         | -           | -         | -         | 1        | -         | -         |           |   |
| pelican             | 1                              | -                  | -         | -         | -         | -         | -         | -         | -            | -         | -           | -         | -         | -        | -         | -         | 1         |   |
| bird                | 4                              | -                  | -         | -         | -         | -         | 3         | -         | -            | -         | -           | -         | 1         | -        | -         | -         |           |   |
| <b>group sum</b>    | <b>44</b>                      | <b>3</b>           | <b>2</b>  | <b>-</b>  | <b>3</b>  | <b>-</b>  | <b>2</b>  | <b>-</b>  | <b>3</b>     | <b>5</b>  | <b>-</b>    | <b>5</b>  | <b>2</b>  | <b>4</b> | <b>6</b>  | <b>5</b>  |           |   |
| <b>sums of sums</b> |                                | <b>280</b>         | <b>19</b> | <b>20</b> | <b>20</b> | <b>20</b> | <b>10</b> | <b>14</b> | <b>18</b>    | <b>18</b> | <b>20</b>   | <b>14</b> | <b>22</b> | <b>9</b> | <b>13</b> | <b>25</b> | <b>34</b> |   |

Figure S1

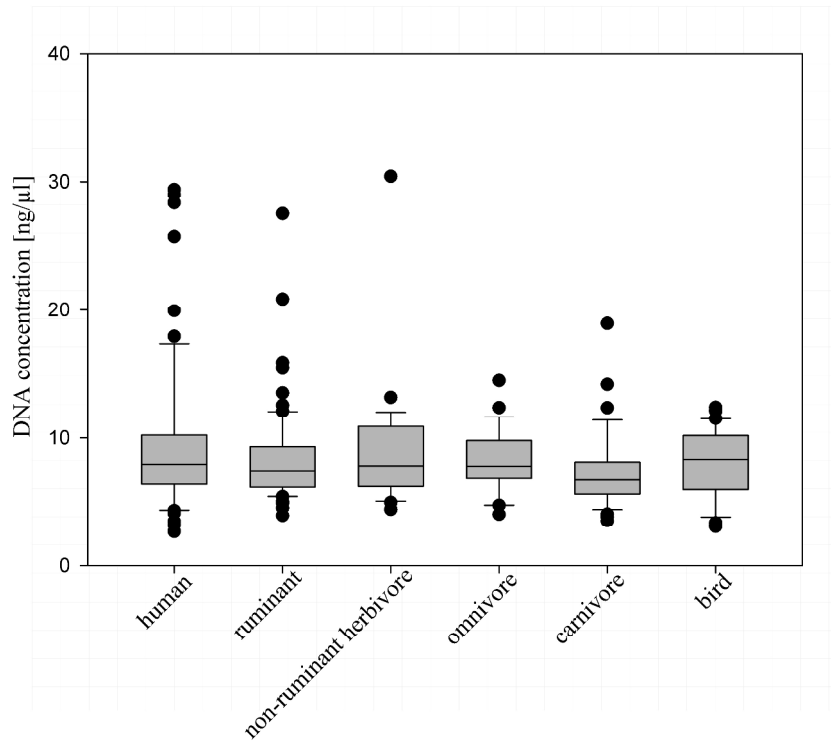

Figure S1 – Distributions of the spectro-photometrically determined DNA concentrations in fecal DNA extracts from the source groups humans (n=61), ruminating mammals (n=79), non-ruminating herbivorous mammals (n=28), omnivorous mammals (n=28), carnivorous mammals (n=29) and birds (n=39). Boxes, 25th and 75th percentile; lines within the boxes, median; whiskers, 10th and 90th percentile, respectively.

Figure S2

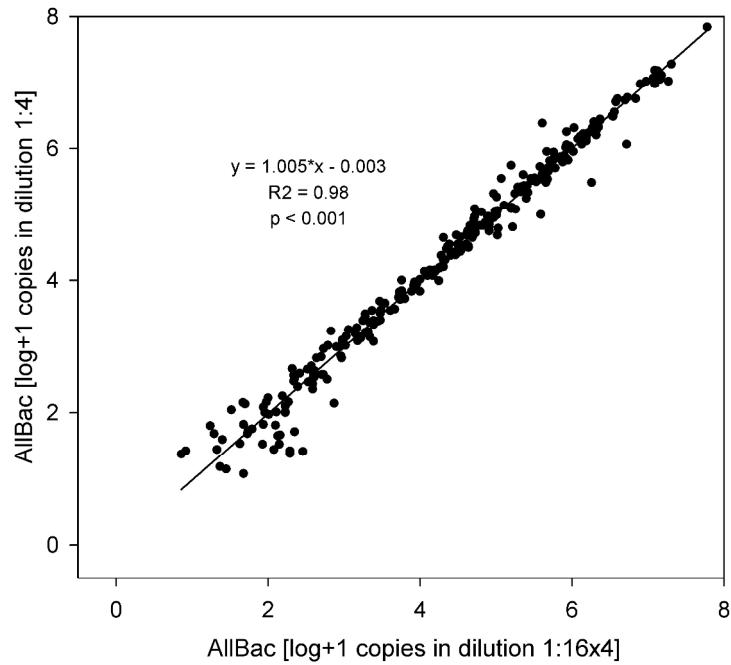

Figure S2 – Scatterplot showing the AllBac marker concentrations measured in the 1:4 dilution, and the 1:16 dilution multiplied by 4, respectively, of the 280 samples included in further analysis. Solid line shows linear regression, equation and coefficient of determination for the regression given in the plot.

Figure S3

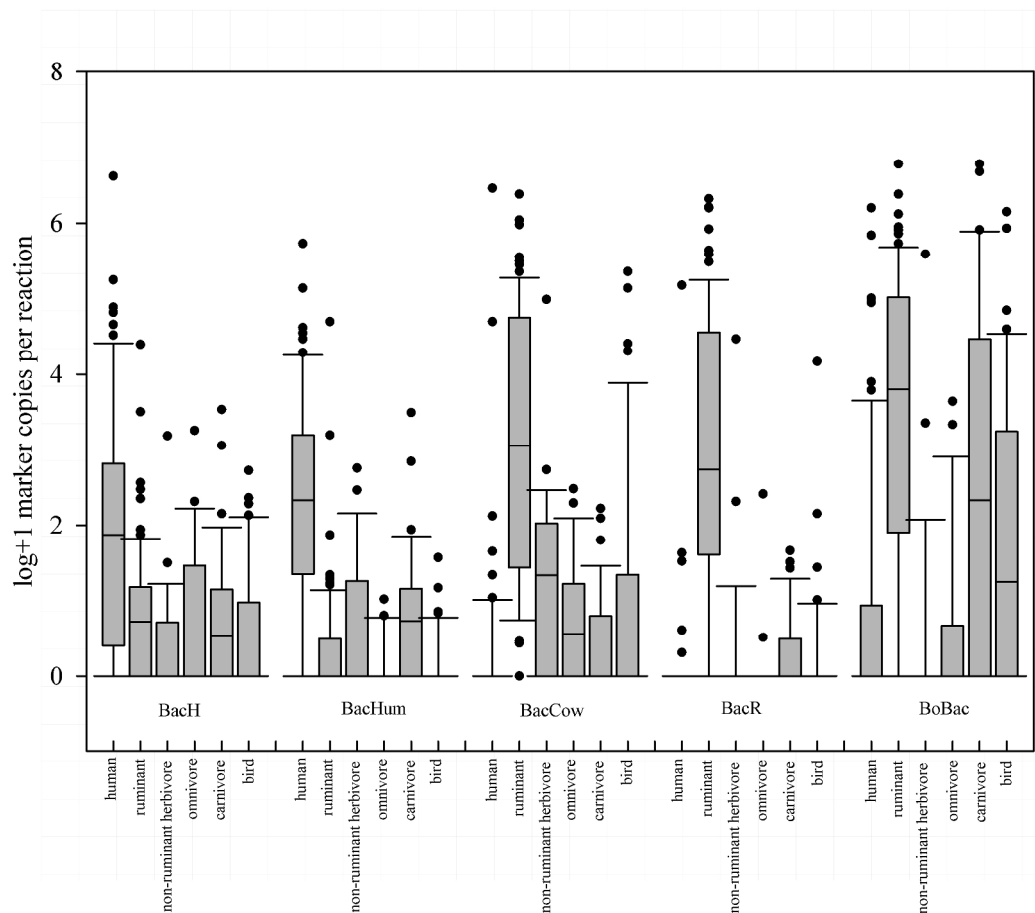

Figure S3 – Marker concentrations of tested assays in fecal DNA extracts from the source groups humans (n=61), ruminating mammals (n=79), non-ruminating herbivorous mammals (n=28), omnivorous mammals (n=28), carnivorous mammals (n=29) and birds (n=39). Results were measured in the 1:4 dilution of the DNA samples and transformed into logarithmic format after addition of 1 to each value. Boxes, 25th and 75th percentile; lines within the boxes, median; whiskers, 10th and 90th percentile, respectively; n, number of samples in each category.

Figure S4 – Quantitative relation of marker concentrations of BacH vs. BacHum (S4a), BacCow vs. BacR (S4b), BacCow vs. BoBac (S4c), BacR vs. BoBac (S4d) in target samples (black dots) and non-target samples (empty dots). Solid lines are the 1<sup>st</sup> median.

Figure S4a

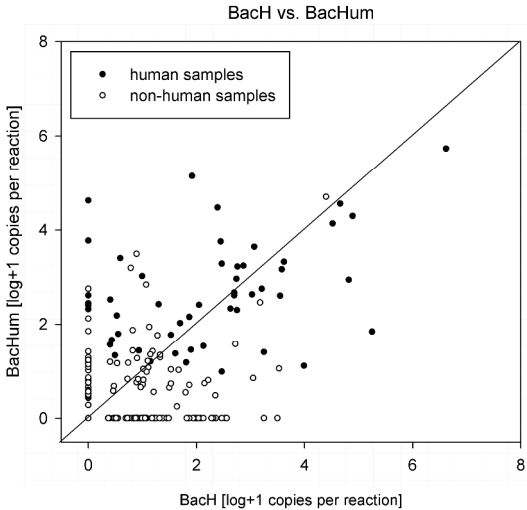

Figure S4b-d

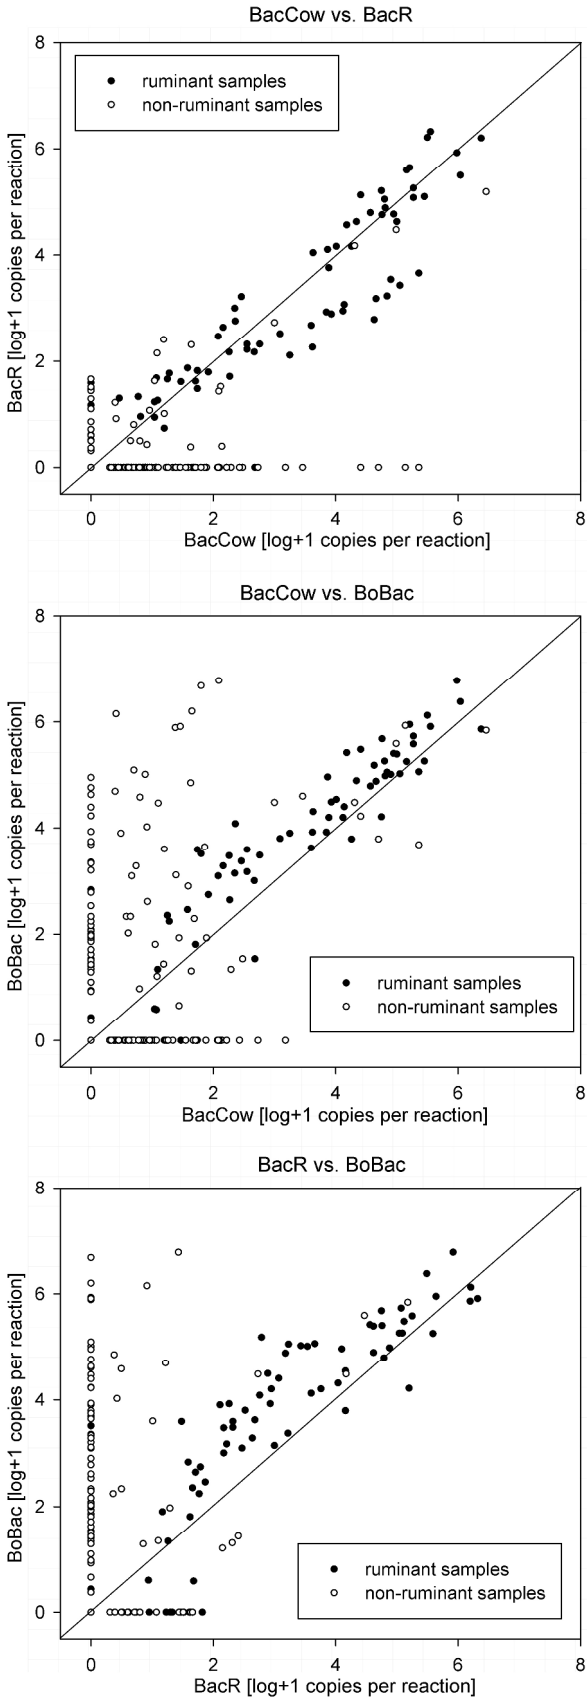



Figure S5 – Marker concentrations of tested assays in target and non-target fecal DNA extracts. Results are given as marker copies per ng of extracted DNA and transformed into logarithmic format after addition of 1 to each value. Boxes, 25<sup>th</sup> and 75<sup>th</sup> percentile; lines within the boxes, median; whiskers, 10<sup>th</sup> and 90<sup>th</sup> percentile, respectively; n, number of samples in each category.

Figure S5

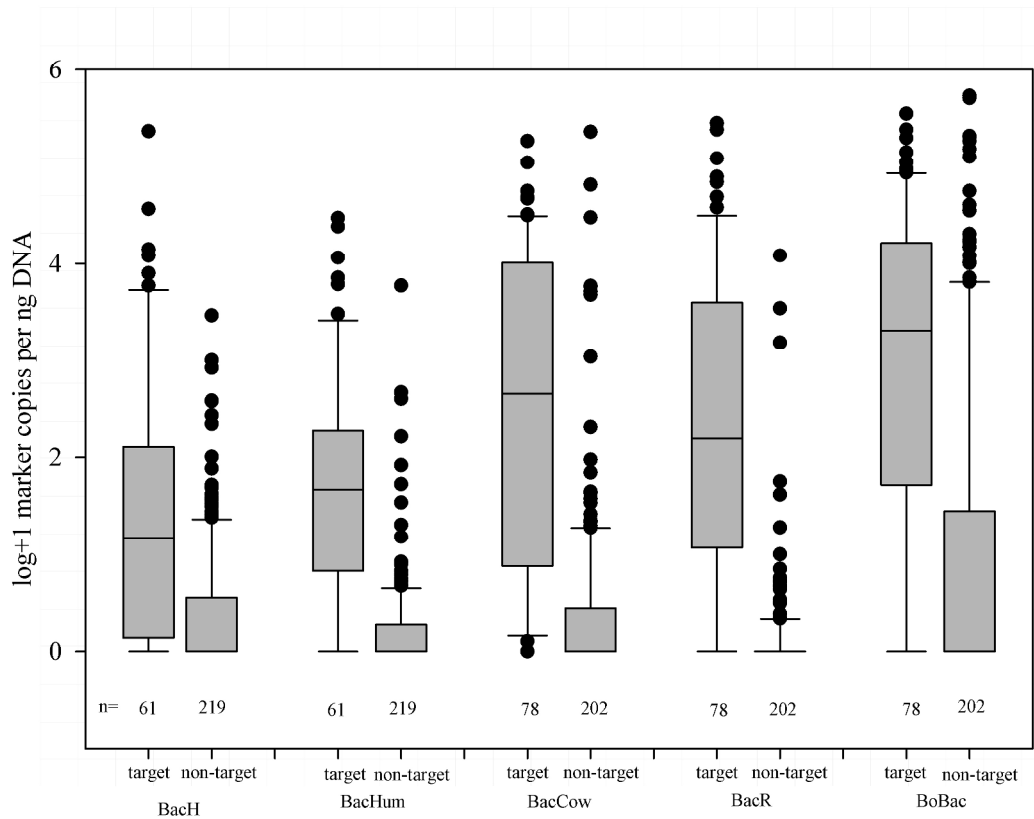

Figure S6a-e – Quantitative relation of AllBac concentration vs. BacH (S6a), BacHum (S6b), BacCow (S6c), BacR (S6d), and BoBac (S6e) in target samples. All data given as marker copies per ng of extracted DNA. The figures only include samples yielding positive results with both assays compared in a plot; dashed lines denote the 1<sup>st</sup> median; solid lines are linear regression curves, equations and coefficients of determination for regressions are given in the figures.

Figure S6a-e

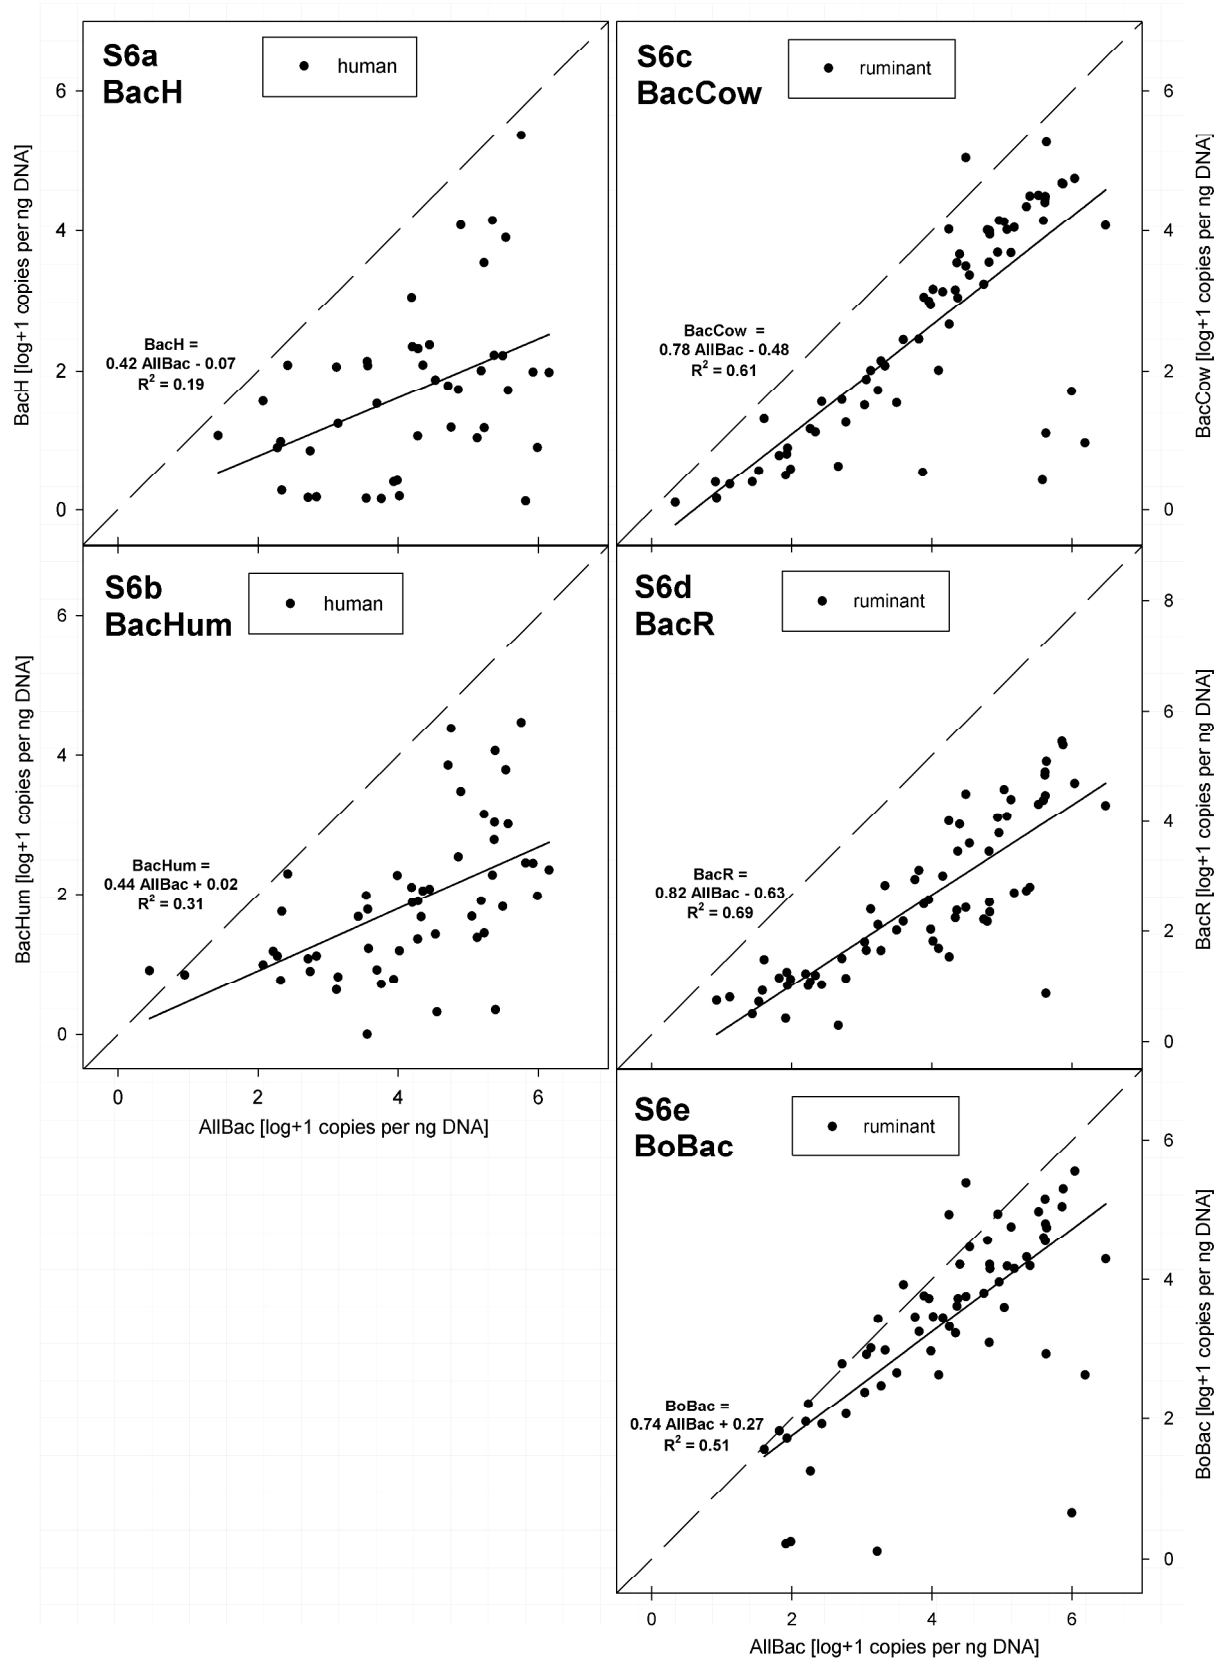

Figure S7a-d – Quantitative relation of marker concentrations of BacH vs. BacHum (S7a), BacCow vs. BacR (S7b), BacCow vs. BoBac (S7c), BacR vs. BoBac (S7d) in target samples (black dots) and non-target samples (empty dots). Solid lines are the 1<sup>st</sup> median. All measurements are given as marker copies per ng of extracted DNA.

Figure S7a

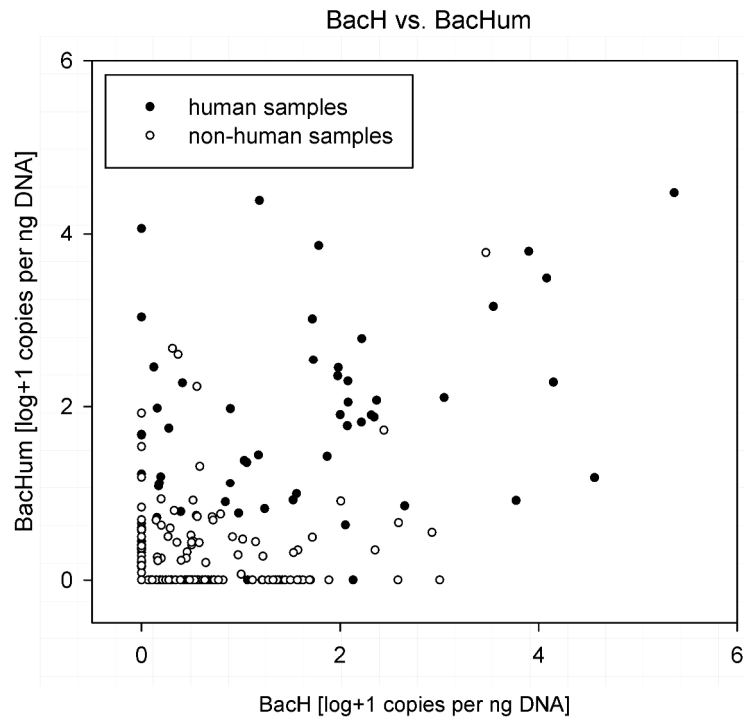

Figure S7b-d

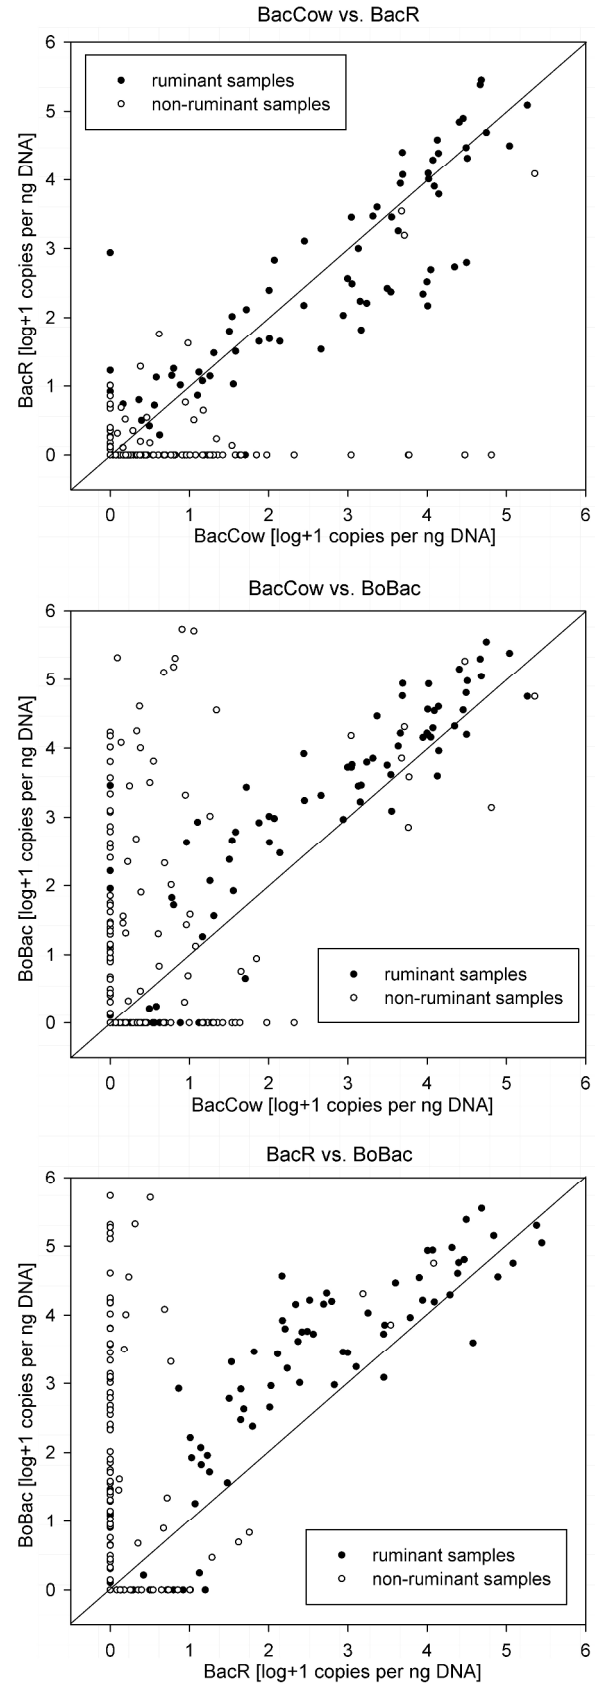

Figure S8

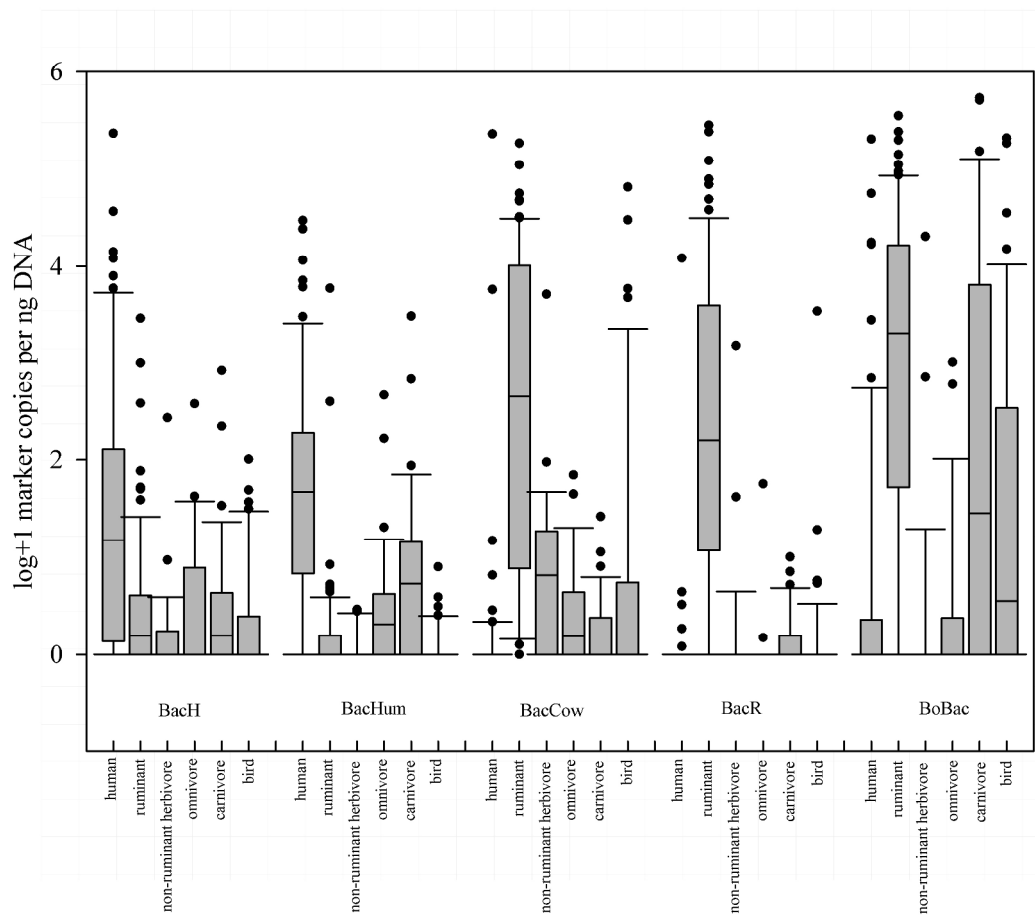

Figure S8 – Marker concentrations of tested assays in fecal DNA extracts from the source groups humans (n=61), ruminating mammals (n=79), non-ruminating herbivorous mammals (n=28), omnivorous mammals (n=28), carnivorous mammals (n=29) and birds (n=39). Results are given as marker copies per ng of extracted DNA and transformed into logarithmic format after addition of 1 to each value. Boxes, 25<sup>th</sup> and 75<sup>th</sup> percentile; lines within the boxes, median; whiskers, 10<sup>th</sup> and 90<sup>th</sup> percentile, respectively; n, number of samples in each category.
